# Supplementary material for: I foro agrario europeo: la nueva PAC
Source: Hindawi journal article supplement (doi:10.1155/2020/7948705), 2013-01-01
Supplement: f1 [file 7948705.f1.pdf]

| Compound                                                                    | Formula                                        | RT (min) | MF  | RMF | Prob (%) | CAS #      | Lib | ID    | MW (g/M) | Ext | Structure                                                                            |
|-----------------------------------------------------------------------------|------------------------------------------------|----------|-----|-----|----------|------------|-----|-------|----------|-----|--------------------------------------------------------------------------------------|
| 8-Azabicyclo[3.2.1]octan-3-ol, 6-methoxy-8-methyl-                          | C <sub>9</sub> H <sub>17</sub> NO <sub>2</sub> | 13.351   | 596 | 817 | 7.27%    | 54725-47-2 | ML  | 81303 | 171      | AdE | 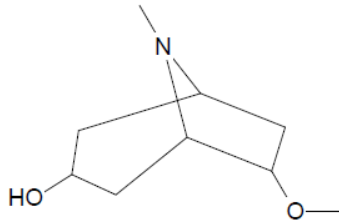  |
| d-Mannose                                                                   | C <sub>6</sub> H <sub>12</sub> O <sub>6</sub>  | 15.298   | 705 | 777 | 22.3%    | 3458-28-4  | ML  | 37454 | 180      | AdE |   |
| 2-Tridecanone                                                               | C <sub>13</sub> H <sub>26</sub> O              | 20.455   | 746 | 827 | 5.68%    | 593-08-8   | RL  | 6452  | 198      | HaE |   |
| Cyclohexane, 1-ethenyl-1-methyl-2-(1-methylethenyl)-4-(1-methylethylidene)- | C <sub>15</sub> H <sub>24</sub>                | 12.670   | 736 | 891 | 7.65%    | 3242-08-8  | RL  | 17769 | 204      | AdE |  |

|                                                                                           |                                   |        |                         |                         |       |            |               |                              |     |     |  |
|-------------------------------------------------------------------------------------------|-----------------------------------|--------|-------------------------|-------------------------|-------|------------|---------------|------------------------------|-----|-----|--|
| <b><math>\gamma</math>-Elemen</b>                                                         | C <sub>15</sub> H <sub>24</sub>   | 12.670 | 733,<br>717<br>&<br>748 | 882,<br>944<br>&<br>911 | 11.5% | 29873-99-2 | ML<br>&<br>RL | 91836,<br>1313<br>&<br>17755 | 204 | AdE |  |
| <b>4,5-di-epi-aristolochene</b>                                                           | C <sub>15</sub> H <sub>24</sub>   | 12.670 | 710                     | 828                     | 2.94% | —          | ML            | 70251                        | 204 | AdE |  |
| <b>6-(3-Isopropenylcycloprop-1-enyl)-6-methylhept-3-en-2-one</b>                          | C <sub>14</sub> H <sub>20</sub> O | 15.500 | 635                     | 693                     | 5.85% | —          | ML            | 91953                        | 204 | AdE |  |
| <b><math>\beta</math>-Guaiene</b>                                                         | C <sub>15</sub> H <sub>24</sub>   | 15.956 | 701                     | 763                     | 6.59% | 88-84-6    | ML            | 133155                       | 204 | AdE |  |
| <b>Naphthalene, decahydro-4a-methyl-1-methylene-7-(1-methylethylidene)-, (4aR-trans)-</b> | C <sub>15</sub> H <sub>24</sub>   | 15.956 | 691                     | 805                     | 4.34% | 515-17-3   | RL            | 23149                        | 204 | AdE |  |

|                                                                                                 |                                               |                                      |                             |                         |                                   |            |               |                   |     |     |                                                                                       |
|-------------------------------------------------------------------------------------------------|-----------------------------------------------|--------------------------------------|-----------------------------|-------------------------|-----------------------------------|------------|---------------|-------------------|-----|-----|---------------------------------------------------------------------------------------|
| d-Glycero-l-gluco-heptose                                                                       | C <sub>7</sub> H <sub>14</sub> O <sub>7</sub> | 15.500<br>&<br>15.725                | 640<br>&<br>621             | 706<br>&<br>701         | 7.26%<br>&<br>4.72%               | —          | ML            | 36984             | 210 | AdE | 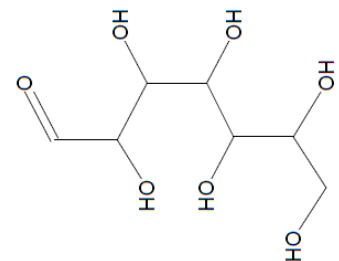   |
| 2-Tetradecanone                                                                                 | C <sub>14</sub> H <sub>28</sub> O             | 20.455                               | 759<br>&<br>754             | 910<br>&<br>854         | 9.43%                             | 2345-27-9  | RL            | 6447&<br>6448     | 212 | HaE |    |
| 1H-Cycloprop[e]azulen-7-ol, decahydro-1,1,7-trimethyl-4-methylene-, [1ar-(1αα,4αα,7β,7αβ,7bα)]- | C <sub>15</sub> H <sub>24</sub> O             | 16.060<br>&<br>18.630                | 755<br>,<br>767<br>&<br>762 | 884,<br>865<br>&<br>799 | 16.9%<br>&<br>7.32%               | 6750-60-3  | RL<br>&<br>ML | 1833<br>&<br>6115 | 220 | AdE |   |
| (-)-Spathulenol                                                                                 | C <sub>15</sub> H <sub>24</sub> O             | 16.060<br>,<br>18.630<br>&<br>18.751 | 730<br>,<br>776<br>&<br>720 | 783,<br>813<br>&<br>781 | 5.16%<br>,<br>10.1%<br>&<br>3.02% | 77171-55-2 | ML            | 5991              |     |     |                                                                                       |
| Tricyclo[5.2.2.0(1,6)]undecan-3-ol, 2-methylene-6,8,8-trimethyl-                                | C <sub>15</sub> H <sub>24</sub> O             | 16.060<br>&<br>18.630                | 722<br>&<br>761             | 806<br>&<br>817         | 3.68%<br>&<br>5.67%               | —          | ML            | 3909              | 220 | AdE |  |

|                                                                                             |                                   |                                      |                             |                         |                                   |           |    |       |     |     |  |
|---------------------------------------------------------------------------------------------|-----------------------------------|--------------------------------------|-----------------------------|-------------------------|-----------------------------------|-----------|----|-------|-----|-----|--|
| Ledene oxide-(II)                                                                           | C <sub>15</sub> H <sub>24</sub> O | 16.060<br>,<br>18.630<br>&<br>18.751 | 720<br>,<br>762<br>&<br>718 | 769,<br>796<br>&<br>776 | 3.39%<br>,<br>5.90%<br>&<br>2.78% |           | ML | 5399  | 220 | AdE |  |
| Isoaromadendrene epoxide                                                                    | C <sub>15</sub> H <sub>24</sub> O | 18.630<br>&<br>18.751                | 780<br>&<br>737             | 841<br>&<br>838         | 11.9%<br>&<br>5.80%               |           | ML | 2203  | 220 | AdE |  |
| α-acorenol                                                                                  | C <sub>15</sub> H <sub>26</sub> O | 12.670<br>&<br>15.956                | 718<br>&<br>714             | 819<br>&<br>785         | 3.94%<br>&<br>10.2%               |           | ML | 89275 | 222 | AdE |  |
| 4aH-Cycloprop[e]azulen-4a-ol, decahydro-1,1,4,7-tetramethyl-, [1aR-(1α,4β,4αβ,7α,7aβ,7ba)]- | C <sub>15</sub> H <sub>26</sub> O | 15.130                               | 716<br>&<br>680             | 825<br>&<br>779         | 24.7%                             | 5986-49-2 | RL | 16287 | 222 | AdE |  |

|                                                                                            |                                   |        |     |     |       |            |    |        |     |     |  |
|--------------------------------------------------------------------------------------------|-----------------------------------|--------|-----|-----|-------|------------|----|--------|-----|-----|--|
| 4aH-cycloprop[e]azulen-4a-ol, decahydro-1,1,4,7-tetramethyl-                               | C <sub>15</sub> H <sub>26</sub> O | 15.130 | 684 | 780 | 6.60% | 95975-84-1 | ML | 79162  | 222 | AdE |  |
| 1H-Cycloprop[e]azulen-4-ol, decahydro-1,1,4,7-tetramethyl-, [1aR-(1aα,4β,4aβ,7α,7aβ,7bα)]- | C <sub>15</sub> H <sub>26</sub> O | 15.130 | 677 | 839 | 4.90% | 552-02-3   | ML | 5852   | 222 | AdE |  |
| 7-epi-cis-sesquisabinene hydrate                                                           | C <sub>15</sub> H <sub>26</sub> O | 15.130 | 677 | 757 | 4.90% |            | ML | 33030  | 222 | AdE |  |
| 4-epi-cubedol                                                                              | C <sub>15</sub> H <sub>26</sub> O | 15.956 | 697 | 762 | 5.57% |            | ML | 133124 | 222 | AdE |  |
| cubedol                                                                                    | C <sub>15</sub> H <sub>26</sub> O | 15.956 | 693 | 772 | 4.70% |            | ML | 133141 |     |     |  |

|                                                                                                                 |                                                |                       |                 |                 |                     |            |    |       |     |     |  |
|-----------------------------------------------------------------------------------------------------------------|------------------------------------------------|-----------------------|-----------------|-----------------|---------------------|------------|----|-------|-----|-----|--|
| 1,4-Methanoazulen-3-ol, decahydro-1,5,5,8a-tetramethyl-, [1S-(1 $\alpha$ ,3 $\beta$ ,3 $\alpha$ ,8 $\alpha$ )]- | C <sub>15</sub> H <sub>26</sub> O              | 17.336                | 656             | 693             | 2.77%               | 99481-30-8 | ML | 50278 | 222 | AdE |  |
| 2-Pentadecanone                                                                                                 | C <sub>15</sub> H <sub>30</sub> O              | 20.455                | 752             | 834             | 7.22%               | 2345-28-0  | ML | 25959 | 226 | HaE |  |
| Cedran-diol, 8S,13-                                                                                             | C <sub>15</sub> H <sub>26</sub> O <sub>2</sub> | 16.060<br>&<br>18.751 | 719<br>&<br>728 | 779<br>&<br>791 | 3.26%<br>&<br>4.16% | 88588-48-1 | ML | 5710  | 238 | AdE |  |
| Methyl tetradecanoate                                                                                           | C <sub>15</sub> H <sub>30</sub> O <sub>2</sub> | 20.894                | 748             | 856             | 10.7%               | 124-10-7   | RL | 9796  | 242 | PgE |  |
| 2-Hexadecanol                                                                                                   | C <sub>16</sub> H <sub>34</sub> O              | 23.805                | 721             | 786             | 4.86%               | 14852-31-4 | RL | 3801  | 242 | PgE |  |

|                                                                                               |                                                               |        |                 |                 |       |             |           |                 |     |     |                                                                                      |
|-----------------------------------------------------------------------------------------------|---------------------------------------------------------------|--------|-----------------|-----------------|-------|-------------|-----------|-----------------|-----|-----|--------------------------------------------------------------------------------------|
| Ethyl tridecanoate                                                                            | C <sub>15</sub> H <sub>30</sub> O <sub>2</sub>                | 22.095 | 794<br>&<br>791 | 863<br>&<br>849 | 15.2% | 28267-29-0  | RL&<br>ML | 11989&<br>52397 | 242 | HaE | 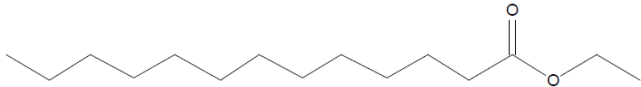  |
| Methyl 6-O-[1-methylpropyl]-β-D-galactopyranoside                                             | C <sub>11</sub> H <sub>22</sub> O <sub>6</sub>                | 15.298 | 663             | 760             | 4.05% |             | ML        | 23313           | 250 | AdE |   |
| Tertbutyloxyformamide, N-methyl-N-[4-(1-pyrrolidinyl)-2-butyrynyl]-                           | C <sub>14</sub> H <sub>24</sub> N <sub>2</sub> O <sub>2</sub> | 13.351 | 614             | 652             | 14.2% | 124045-68-7 | ML        | 34145           | 252 | AdE |   |
| Spiro[tricyclo[4.4.0.0(5,9)]decane-10,2'-oxirane], 1-methyl-4-isopropyl-7,8-dihydroxy-, (8S)- | C <sub>15</sub> H <sub>24</sub> O <sub>3</sub>                | 15.500 | 644             | 675             | 8.60% |             | ML        | 142870          | 252 | AdE |  |

|                                                                                     |                                                |                 |           |           |               |            |    |        |     |           |                                                                                       |
|-------------------------------------------------------------------------------------|------------------------------------------------|-----------------|-----------|-----------|---------------|------------|----|--------|-----|-----------|---------------------------------------------------------------------------------------|
| 5,6,7,8,9,10-Hexahydro-9-methyl-spiro[2H-1,3-benzoxazine-4,1'-cyclohexane]-2-thione | C <sub>14</sub> H <sub>23</sub> NOS            | 13.351          | 599       | 639       | 8.23%         |            | ML | 131040 | 253 | AdE       | 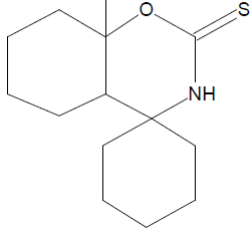   |
| 2-Heptadecanone                                                                     | C <sub>17</sub> H <sub>34</sub> O              | 20.455          | 791       | 825       | 31.1%         | 2922-51-2  | RL | 2300   | 254 | HaE       |    |
| Tetradecanoic acid, 12-methyl-, methyl ester                                        | C <sub>16</sub> H <sub>32</sub> O <sub>2</sub> | 20.894 & 24.607 | 743 & 705 | 774 & 759 | 8.64% & 5.32% | 5129-66-8  | ML | 40491  | 256 | PgE       |    |
| 1-Hexadecanol, 2-methyl-                                                            | C <sub>17</sub> H <sub>36</sub> O              | 23.805 & 29.303 | 722 & 694 | 776 & 735 | 5.06% & 5.66% | 2490-48-4  | ML | 22458  | 256 | PgE & HaE |    |
| tert-Hexadecanethiol                                                                | C <sub>16</sub> H <sub>34</sub> S              | 29.303          | 711       | 761       | 10.7%         | 25360-09-2 | ML | 23376  | 258 | HaE       |  |
| 14-Octadecenal                                                                      | C <sub>18</sub> H <sub>34</sub> O              | 22.673          | 803       | 826       | 5.96%         | 56554-89-3 | ML | 46618  | 266 | PgE       |  |



|                                              |                                                |        |     |     |       |            |    |       |     |     |  |
|----------------------------------------------|------------------------------------------------|--------|-----|-----|-------|------------|----|-------|-----|-----|--|
| 16-Octadecenal                               | C <sub>18</sub> H <sub>34</sub> O              | 22.673 | 802 | 825 | 5.73% | 56554-87-1 | ML | 46617 | 266 | PgE |  |
| 10-Octadecenal                               | C <sub>18</sub> H <sub>34</sub> O              | 22.673 | 795 | 819 | 4.39% | 56554-92-8 | ML | 22746 | 266 | PgE |  |
| 12-Octadecenal                               | C <sub>18</sub> H <sub>34</sub> O              | 22.673 | 794 | 822 | 4.22% | 56554-91-7 | ML | 46620 | 266 | PgE |  |
| 5-Octadecenal                                | C <sub>18</sub> H <sub>34</sub> O              | 23.805 | 728 | 779 | 6.53% | 56554-88-2 | ML | 22758 | 266 | PgE |  |
| 4-Octadecenal                                | C <sub>18</sub> H <sub>34</sub> O              | 23.805 | 720 | 771 | 4.67% | 56554-98-4 | ML | 22760 | 266 | PgE |  |
| Hexadecanoic acid, methyl ester              | C <sub>17</sub> H <sub>34</sub> O <sub>2</sub> | 20.894 | 751 | 836 | 12.1% | 112-39-0   | RL | 9767  | 270 | PgE |  |
|                                              | C <sub>17</sub> H <sub>34</sub> O <sub>2</sub> | 20.894 | 739 | 794 | 12.1% | 112-39-0   | ML | 40690 |     |     |  |
| Pentadecanoic acid, 14-methyl-, methyl ester | C <sub>17</sub> H <sub>34</sub> O <sub>2</sub> | 20.894 | 738 | 830 | 6.96% | 5129-60-2  | ML | 40704 | 270 | PgE |  |

|                                           |                     |                                      |                         |                         |                                   |             |    |       |     |            |                                                                                       |
|-------------------------------------------|---------------------|--------------------------------------|-------------------------|-------------------------|-----------------------------------|-------------|----|-------|-----|------------|---------------------------------------------------------------------------------------|
| Tridecanoic acid, 13-formyl-, ethyl ester | $C_{16}H_{30}O_3$   | 25.814                               | 659                     | 709                     | 2.32%                             | 101434-22-4 | ML | 52481 | 270 | <i>PgE</i> | 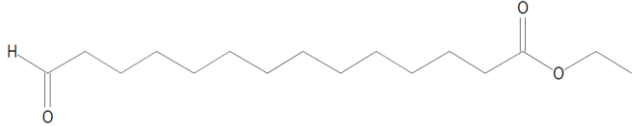   |
| Pentadecanoic acid, ethyl ester           | $C_{17}H_{34}O_2$   | 22.095                               | 791                     | 841                     | 13.4%                             | 41114-00-5  | ML | 52728 | 270 | <i>HaE</i> |    |
| Undecanoic acid, 11-bromo-, methyl ester  | $C_{12}H_{23}BrO_2$ | 17.336                               | 666                     | 715                     | 4.16%                             | 6287-90-7   | RL | 9817  | 278 | <i>AdE</i> |    |
| Desulphosinigrin                          | $C_{10}H_{17}NO_6S$ | 15.298<br>,<br>15.500<br>&<br>15.725 | 704,<br>660<br>&<br>669 | 776,<br>730<br>&<br>760 | 21.5%<br>,<br>14.9%<br>&<br>27.4% | 5115-81-1   | ML | 28432 | 279 | <i>AdE</i> |   |
| 9,12-Octadecadienoic acid (Z,Z)-          | $C_{18}H_{32}O_2$   | 37.203                               | 709                     | 751                     | 3.03%                             | 60-33-3     | RL | 7667  | 280 | <i>HaE</i> |  |

|                                             |                                                |        |     |     |       |            |    |       |     |     |                                                                                       |
|---------------------------------------------|------------------------------------------------|--------|-----|-----|-------|------------|----|-------|-----|-----|---------------------------------------------------------------------------------------|
| Ethyl 9,12-hexadecadienoate                 | C <sub>18</sub> H <sub>32</sub> O <sub>2</sub> | 37.203 | 708 | 793 | 2.92% | —          | ML | 30104 | 280 | HaE | 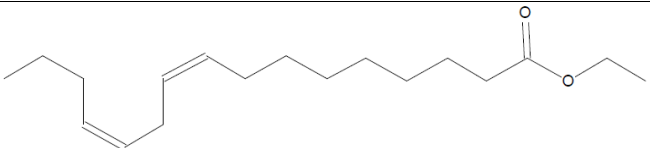   |
| 2-Nonadecanone                              | C <sub>19</sub> H <sub>38</sub> O              | 20.455 | 771 | 906 | 14.2% | 629-66-3   | ML | 25712 | 282 | HaE |    |
| cis-Vaccenic acid                           | C <sub>18</sub> H <sub>34</sub> O <sub>2</sub> | 25.353 | 763 | 791 | 5.10% | 506-17-2   | ML | 18782 | 282 | HaE |    |
| trans-13-Octadecenoic acid                  | C <sub>18</sub> H <sub>34</sub> O <sub>2</sub> | 25.353 | 760 | 792 | 4.53% | 693-71-0   | ML | 18062 | 282 | HaE |    |
| Ethyl 9-hexadecenoate                       | C <sub>18</sub> H <sub>34</sub> O <sub>2</sub> | 34.443 | 659 | 722 | 3.24% | 54546-22-4 | ML | 19602 | 282 | HaE |   |
| Hexadecanoic acid, 14-methyl-, methyl ester | C <sub>18</sub> H <sub>36</sub> O <sub>2</sub> | 20.894 | 738 | 748 | 6.96% | 2490-49-5  | ML | 40703 | 284 | PgE |  |
| Hexadecanoic acid, ethyl ester              | C <sub>18</sub> H <sub>36</sub> O <sub>2</sub> | 22.101 | 814 | 827 | 56.5% | 628-97-7   | RL | 12003 | 284 | PgE |  |

|                                             |                                                |        |     |     |       |            |    |       |     |            |                                                                                       |
|---------------------------------------------|------------------------------------------------|--------|-----|-----|-------|------------|----|-------|-----|------------|---------------------------------------------------------------------------------------|
|                                             |                                                |        | 733 | 790 | 56.5% | 628-97-7   | ML | 52733 |     |            |                                                                                       |
|                                             |                                                |        | 724 | 830 | 56.5% | 628-97-7   | RL | 12002 |     |            |                                                                                       |
| Hexadecanoic acid, 14-methyl-, methyl ester | C <sub>18</sub> H <sub>36</sub> O <sub>2</sub> | 24.607 | 710 | 735 | 6.55% | 2490-49-5  | ML | 40703 |     |            |                                                                                       |
| Hexadecanoic acid, ethyl ester              | C <sub>18</sub> H <sub>36</sub> O <sub>2</sub> | 25.814 | 761 | 818 | 60.1% | 628-97-7   | RL | 12003 |     |            |                                                                                       |
|                                             |                                                | 22.095 | 797 | 812 | 17.2% | 628-97-7   | ML | 52733 | 284 | <i>HaE</i> |                                                                                       |
|                                             |                                                | 22.095 | 789 | 789 | 17.2% | 628-97-7   | RL | 12003 |     |            |                                                                                       |
| Methyl 16-hydroxy-hexadecanoate             | C <sub>17</sub> H <sub>34</sub> O <sub>3</sub> | 24.607 | 709 | 814 | 6.30% | 21987-14-4 | ML | 19119 | 286 | <i>PgE</i> |  |
| 10,13-Octadecadiynoic acid, methyl ester    | C <sub>19</sub> H <sub>30</sub> O <sub>2</sub> | 16.060 | 726 | 745 | 4.36% | 18202-24-9 | ML | 55439 | 290 | <i>AdE</i> |  |

|                                             |                                                |                 |           |           |               |            |    |       |     |           |  |
|---------------------------------------------|------------------------------------------------|-----------------|-----------|-----------|---------------|------------|----|-------|-----|-----------|--|
| 6,9,12-Octadecatrienoic acid, methyl ester  | C <sub>19</sub> H <sub>32</sub> O <sub>2</sub> | 27.125          | 680       | 713       | 4.21%         | 2676-41-7  | ML | 30024 | 292 | PgE       |  |
| Methyl 6,11-octadecadienoate                | C <sub>19</sub> H <sub>34</sub> O <sub>2</sub> | 37.203          | 708       | 785       | 2.92%         | —          | ML | 45926 | 294 | HaE       |  |
| Cyclopentanetri-decanoic acid, methyl ester | C <sub>19</sub> H <sub>36</sub> O <sub>2</sub> | 24.607          | 702       | 840       | 4.70%         | 24828-61-3 | ML | 40685 | 296 | PgE       |  |
| 16-Octadecenoic acid, methyl ester          | C <sub>19</sub> H <sub>36</sub> O <sub>2</sub> | 24.821          | 675       | 699       | 3.55%         | 56554-49-5 | ML | 18104 | 296 | PgE       |  |
| 10-Octadecenoic acid, methyl ester          | C <sub>19</sub> H <sub>36</sub> O <sub>2</sub> | 25.353 & 17.336 | 762 & 659 | 775 & 668 | 4.90% & 3.14% | 13481-95-3 | ML | 18073 | 296 | HaE & AdE |  |
| 11-Octadecenoic acid, methyl ester          | C <sub>19</sub> H <sub>36</sub> O <sub>2</sub> | 25.353          | 761       | 785       | 4.71%         | 52380-33-3 | ML | 17844 | 296 | HaE       |  |
| Heptadecanoic acid, ethyl ester             | C <sub>19</sub> H <sub>38</sub> O <sub>2</sub> | 22.101          | 727       | 804       | 4.98%         | 14010-23-2 | ML | 52724 | 298 | PgE       |  |
| Ethyl 14-methyl-hexadecanoate               | C <sub>19</sub> H <sub>38</sub> O <sub>2</sub> | 22.101 & 25.814 | 725 & 697 | 785 & 790 | 4.59% & 9.87% | 2490-49-5  | ML | 52472 | 298 | PgE       |  |

|                                                                                                             |                                                |                 |           |           |               |            |    |        |     |     |                                                                                       |
|-------------------------------------------------------------------------------------------------------------|------------------------------------------------|-----------------|-----------|-----------|---------------|------------|----|--------|-----|-----|---------------------------------------------------------------------------------------|
|                                                                                                             |                                                |                 |           |           |               |            |    |        |     |     |                                                                                       |
| Heptadecanoic acid, ethyl ester                                                                             | C <sub>19</sub> H <sub>38</sub> O <sub>2</sub> | 25.814          | 654       | 781       | 1.87%         | 14010-23-2 | ML | 52724  | 298 | PgE | 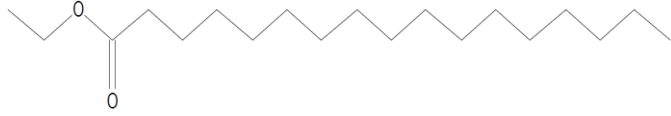   |
| Oxiraneoctanoic acid, 3-octyl-, cis-                                                                        | C <sub>18</sub> H <sub>34</sub> O <sub>3</sub> | 20.351          | 724       | 743       | 21.2%         | 24560-98-3 | RL | 4389   | 298 | AdE |    |
| Benz[e]azulene-3,8-dione, 3a,4,6a,7,9,10,10a,10b-octahydro-3a,10a-dihydroxy-5-(hydroxymethyl)-2,10-dimethyl | C <sub>17</sub> H <sub>22</sub> O <sub>5</sub> | 53.432          | 650       | 701       | 5.62%         | 25578-89-6 | ML | 166443 | 306 | HaE |    |
| 2H-Cyclohepta[b]furan-2-one, 6-[1-(acetyloxy)-3-oxobutyl]-3,3a,4,7,8,8a-hexahydro-7-methyl-3-methylene-     | C <sub>17</sub> H <sub>22</sub> O <sub>5</sub> | 16.609          | 709       | 759       | 6.57%         | 580-49-4   | RL | 1908   | 306 | AdE |   |
| Cyclopropaneoctanoic acid, 2-octyl-, methyl ester                                                           | C <sub>20</sub> H <sub>38</sub> O <sub>2</sub> | 24.607 & 24.821 | 702 & 675 | 723 & 708 | 4.70% & 3.55% | 10152-62-2 | RL | 4725   | 310 | PgE |  |

|                                                              |                   |                                      |                         |                         |                                   |            |    |               |     |     |                                                                                       |
|--------------------------------------------------------------|-------------------|--------------------------------------|-------------------------|-------------------------|-----------------------------------|------------|----|---------------|-----|-----|---------------------------------------------------------------------------------------|
| Cyclopropanepentanoic acid, 2-undecyl-, methyl ester, trans- | $C_{20}H_{38}O_2$ | 24.607                               | 693                     | 720                     | 3.41%                             | 42199-20-2 | ML | 2255          | 310 | PgE |    |
| Ethyl Oleate                                                 | $C_{20}H_{38}O_2$ | 25.353<br>,<br>25.353<br>&<br>34.443 | 759,<br>756<br>&<br>652 | 782,<br>773<br>&<br>717 | 4.35%<br>,<br>4.35%<br>&<br>2.43% | 111-62-6   | RL | 4704&<br>4703 | 310 | HaE |    |
| cis-13-Eicosenoic acid                                       | $C_{20}H_{38}O_2$ | 34.443                               | 662                     | 736                     | 3.67%                             | 17735-94-3 | ML | 18940         | 310 | HaE |    |
| Methyl 15-hydroxy-9,12-octadecadienoate                      | $C_{19}H_{34}O_3$ | 37.203                               | 711                     | 761                     | 3.28%                             | —          | ML | 19181         | 310 | HaE |   |
| Ethanol, 2-(9-octadecenyl-), (Z)-                            | $C_{20}H_{40}O_2$ | 22.673                               | 825                     | 838                     | 15.1%                             | 5353-25-3  | ML | 19248         | 312 | PgE |  |

|                                                         |                                                |                 |           |           |               |            |    |              |     |          |                                                                                      |
|---------------------------------------------------------|------------------------------------------------|-----------------|-----------|-----------|---------------|------------|----|--------------|-----|----------|--------------------------------------------------------------------------------------|
| Oxiraneundecanoic acid, 3-pentyl-, methyl ester, cis-   | C <sub>19</sub> H <sub>36</sub> O <sub>3</sub> | 24.821 & 17.336 | 682 & 665 | 705 & 674 | 4.71% & 4.00% | 8520-30-8  | ML | 17859        | 312 | PgE& AdE |   |
| Oxiraneundecanoic acid, 3-pentyl-, methyl ester, trans- | C <sub>19</sub> H <sub>36</sub> O <sub>3</sub> | 24.821 & 17.336 | 681 & 670 | 704 & 679 | 4.52% & 4.92% | 38520-31-9 | ML | 17744        | 312 | PgE& AdE |   |
| Octadecanoic acid, ethyl ester                          | C <sub>20</sub> H <sub>40</sub> O <sub>2</sub> | 25.814 & 22.095 | 660 & 778 | 702 & 834 | 2.41% & 8.68% | 111-61-5   | RL | 12004& 12005 | 312 | PgE& HaE |   |
| Ethanol, 2-(octadecyloxy)-                              | C <sub>20</sub> H <sub>42</sub> O <sub>2</sub> | 22.095          | 704       | 735       | 8.23%         | 2136-72-3  | ML | 22653        | 314 | HaE      |   |
| Erythro-9,10-dihydroxyoctadecanoic acid                 | C <sub>18</sub> H <sub>36</sub> O <sub>4</sub> | 20.351          | 691       | 727       | 5.44%         | 3639-32-5  | ML | 127728       | 316 | AdE      |  |



|                                                         |                                                   |                       |                 |                 |                     |            |    |       |     |     |                                                                                       |
|---------------------------------------------------------|---------------------------------------------------|-----------------------|-----------------|-----------------|---------------------|------------|----|-------|-----|-----|---------------------------------------------------------------------------------------|
| 5,8,11,14-Eicosatetraenoic acid, methyl ester, (all-Z)- | C <sub>21</sub> H <sub>34</sub> O <sub>2</sub>    | 27.125                | 680             | 805             | 4.21%               | 2566-89-4  | RL | 10455 | 318 | PgE | 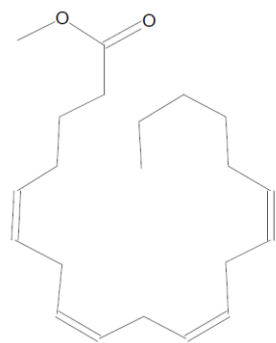   |
| Androstan-17-one, 3-ethyl-3-hydroxy-, (5α)-             | C <sub>21</sub> H <sub>34</sub> O <sub>2</sub>    | 16.609<br>&<br>18.751 | 703<br>&<br>722 | 746             | 5.12%<br>&<br>3.27% | 57344-99-7 | ML | 55206 | 318 | AdE |    |
| 7,10,13-Eicosatrienoic acid, methyl ester               | C <sub>21</sub> H <sub>36</sub> O <sub>2</sub>    | 27.125                | 687             | 715             | 5.66%               | 30223-51-9 | RL | 7646  | 320 | PgE |    |
| Trinexapac-ethyl, trimethylsilyl ether                  | C <sub>16</sub> H <sub>24</sub> O <sub>5</sub> Si | 42.216                | 593             | 652             | 9.12%               | —          | ML | 39428 | 324 | PgE |   |
| Nonadecanoic acid, ethyl ester                          | C <sub>21</sub> H <sub>42</sub> O <sub>2</sub>    | 22.101<br>&<br>25.814 | 723<br>&<br>676 | 772<br>&<br>765 | 4.23%<br>&<br>4.19% | 18281-04-4 | ML | 52717 | 326 | PgE |  |

|                                                                                                         |                      |                                                     |                                 |                                 |                                                 |            |    |        |     |     |  |
|---------------------------------------------------------------------------------------------------------|----------------------|-----------------------------------------------------|---------------------------------|---------------------------------|-------------------------------------------------|------------|----|--------|-----|-----|--|
| 6-Amino-5-cyano-4-(5-cyano-2,4-dimethyl-1H-pyrrol-3-yl)-2-methyl-4H-pyran-3-carboxylic acid ethyl ester | $C_{17}H_{18}N_4O_3$ | 29.846<br>,<br>30.354<br>,<br>42.216<br>&<br>46.889 | 589,<br>584,<br>572<br>&<br>576 | 647,<br>642,<br>645<br>&<br>636 | 3.12%<br>,<br>2.31%<br>,<br>4.41%<br>&<br>4.65% |            | ML | 166229 | 326 | PgE |  |
| Androst-5,7-dien-3-ol-17-one, acetate                                                                   | $C_{21}H_{28}O_3$    | 29.846<br>&<br>30.354                               | 580<br>&<br>589                 | 615<br>&<br>631                 | 2.26%<br>&<br>2.87%                             |            | ML | 13366  | 328 | PgE |  |
| Octadecanoic acid, 9,10-dihydroxy-, methyl ester                                                        | $C_{19}H_{38}O_4$    | 20.351                                              | 680                             | 726                             | 3.73%                                           | 1115-01-1  | RL | 4577   | 330 | AdE |  |
| 5,8,11,14-Eicosatetraenoic acid, ethyl ester, (all-Z)-                                                  | $C_{22}H_{36}O_2$    | 27.125                                              | 690                             | 761                             | 6.40%                                           | 1808-26-0  | ML | 44292  | 332 | PgE |  |
| Ethyl 5,8,11,14-eicosatetraenoate                                                                       | $C_{22}H_{36}O_2$    | 27.125                                              | 682                             | 758                             | 4.56%                                           | 95285-77-1 | ML | 44584  | 332 | PgE |  |

|                                                             |                                                                 |                                      |                                 |                                 |                                   |            |           |                |     |     |                                                                                      |
|-------------------------------------------------------------|-----------------------------------------------------------------|--------------------------------------|---------------------------------|---------------------------------|-----------------------------------|------------|-----------|----------------|-----|-----|--------------------------------------------------------------------------------------|
| 17 $\alpha$ -Hydroxypregnenolone                            | C <sub>21</sub> H <sub>32</sub> O <sub>3</sub>                  | 40.316                               | 660                             | 692                             | 4.74%                             |            | ML        | 9645           | 332 | HaE | 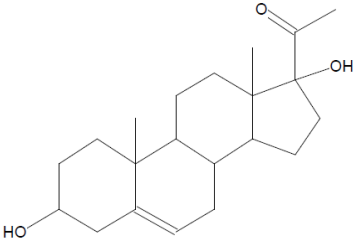  |
| 2H-Pyran, 2-(7-heptadecyloxy)tetrahydro-                    | C <sub>22</sub> H <sub>40</sub> O <sub>2</sub>                  | 16.609                               | 694                             | 727                             | 3.48%                             | 56599-50-9 | ML        | 17855          | 336 | AdE |   |
| Arsenous acid, tris(trimethylsilyl) ester                   | C <sub>9</sub> H <sub>27</sub> AsO <sub>3</sub> Si <sub>3</sub> | 46.889                               | 580                             | 840                             | 5.50%                             | 55429-29-3 | ML        | 166530         | 342 | PgE |   |
| $\beta$ -D-Glucopyranose, 4-O- $\beta$ -D-galactopyranosyl- | C <sub>12</sub> H <sub>22</sub> O <sub>11</sub>                 | 15.298<br>,<br>15.500<br>&<br>15.725 | 692,<br>684,<br>646<br>&<br>641 | 746,<br>767,<br>692<br>&<br>706 | 14.3%<br>,<br>9.31%<br>&<br>9.67% | 5965-66-2  | ML&<br>RL | 36989&<br>8898 | 342 | AdE |  |

|                                                                                                             |                      |        |     |     |       |            |    |       |     |     |  |
|-------------------------------------------------------------------------------------------------------------|----------------------|--------|-----|-----|-------|------------|----|-------|-----|-----|--|
| Maltose                                                                                                     | $C_{12}H_{22}O_{11}$ | 15.298 | 661 | 733 | 3.73% | 69-79-4    | ML | 37466 | 342 | AdE |  |
| Octadecanal, 2-bromo-                                                                                       | $C_{18}H_{35}BrO$    | 22.673 | 803 | 811 | 5.96% | 56599-95-2 | ML | 7263  | 346 | PgE |  |
| Benz[e]azulene-3,8-dione, 5-[(acetyloxy)methyl]-3a,4,6a,7,9,10,10a,10b-octahydro-3a,10a-dihydroxy-2,10-dime | $C_{19}H_{24}O_6$    | 53.432 | 657 | 706 | 7.56% | 25536-74-7 | ML | 12792 | 348 | HaE |  |
| Methyl 5,9-docosadienoate                                                                                   | $C_{23}H_{42}O_2$    | 37.203 | 725 | 817 | 5.25% | —          | ML | 45683 | 350 | HaE |  |

|                                                                                                                     |                                                               |        |     |     |       |            |    |       |     |     |                                                                                       |
|---------------------------------------------------------------------------------------------------------------------|---------------------------------------------------------------|--------|-----|-----|-------|------------|----|-------|-----|-----|---------------------------------------------------------------------------------------|
| <p>Propanoic acid, 2-methyl-, (dodecahydro-6a-hydroxy-9a-methyl-3-methylene-2,9-dioxoazuleno[4,5-b]furan-6-yl)m</p> | C <sub>19</sub> H <sub>26</sub> O <sub>6</sub>                | 16.609 | 699 | 733 | 4.32% | 33649-17-1 | ML | 7019  | 350 | AdE | 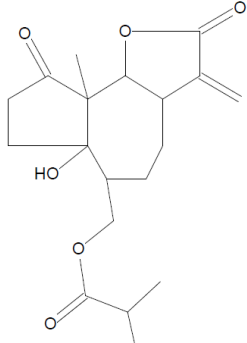   |
| <p>9,10-Secochola-5,7,10(19)-trien-24-al, 3-hydroxy-, (3β,5Z,7E)-</p>                                               | C <sub>24</sub> H <sub>36</sub> O <sub>2</sub>                | 16.609 | 723 | 804 | 10.5% | 40013-88-5 | ML | 88071 | 356 | AdE |    |
| <p>3-[(8a-Methyl-5-methylene-2-oxo-dodecahydro-naphtho[2,3-b]furan-3-ylmethyl)-amino]-azepan-2-one</p>              | C <sub>21</sub> H <sub>32</sub> N <sub>2</sub> O <sub>3</sub> | 13.351 | 594 | 650 | 6.71% |            | ML | 49312 | 360 | AdE |   |
| <p>Cyclopropanedodecanoic acid, 2-octyl-, methyl ester</p>                                                          | C <sub>24</sub> H <sub>46</sub> O <sub>2</sub>                | 24.821 | 693 | 712 | 6.86% | 10152-65-5 | ML | 2537  | 366 | PgE |  |

|                                                                                                                          |                                                |                       |                 |                 |                     |            |    |       |     |     |                                                                                       |
|--------------------------------------------------------------------------------------------------------------------------|------------------------------------------------|-----------------------|-----------------|-----------------|---------------------|------------|----|-------|-----|-----|---------------------------------------------------------------------------------------|
| 4,6,8(14)-Cholestatriene                                                                                                 | C <sub>27</sub> H <sub>42</sub>                | 29.846                | 579             | 646             | 2.18%               | 51028-26-3 | ML | 13246 | 366 | PgE | 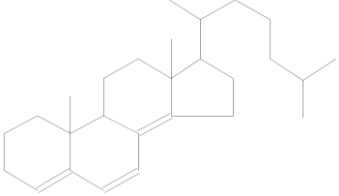   |
| Octadecane, 3-ethyl-5-(2-ethylbutyl)-                                                                                    | C <sub>26</sub> H <sub>54</sub>                | 44.128                | 681             | 686             | 3.65%               | 55282-12-7 | ML | 7471  | 366 | HaE |    |
| Cyclopropanedodecanoic acid, 2-octyl-, methyl ester                                                                      | C <sub>24</sub> H <sub>46</sub> O <sub>2</sub> | 17.336                | 675             | 682             | 6.11%               | 10152-65-5 | ML | 2537  | 366 | AdE |    |
| Cyclopropanebutanoic acid, 2-[[[2-[[[2-(2-pentylcyclopropyl)methyl]cyclopropyl]methyl]cyclopropyl]methyl]-, methyl ester | C <sub>25</sub> H <sub>42</sub> O <sub>2</sub> | 24.821                | 706             | 769             | 10.6%               | 56051-53-7 | ML | 40568 | 374 | PgE |   |
| 3β-Hydroxy-5-cholen-24-oic acid                                                                                          | C <sub>24</sub> H <sub>38</sub> O <sub>3</sub> | 44.128<br>&<br>47.068 | 664<br>&<br>671 | 676<br>&<br>717 | 3.09%<br>&<br>1.39% | 5255-17-4  | ML | 75250 | 374 | HaE |  |

|                                                                                                                          |           |        |     |     |       |            |    |       |     |     |                                                                                      |
|--------------------------------------------------------------------------------------------------------------------------|-----------|--------|-----|-----|-------|------------|----|-------|-----|-----|--------------------------------------------------------------------------------------|
| Cyclopropanebutanoic acid, 2-[[[2-[[[2-(2-pentylcyclopropyl)methyl]cyclopropyl]methyl]cyclopropyl]methyl]-, methyl ester | C25H42O2  | 16.609 | 705 | 759 | 5.55% | 56051-53-7 | ML | 40568 | 374 | AdE | 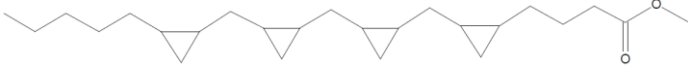  |
| Desoximetasone                                                                                                           | C22H29FO4 | 15.130 | 682 | 708 | 6.08% | 382-67-2   | ML | 93616 | 376 | AdE |   |
| 15-Tetracosenoic acid, methyl ester, (Z)-                                                                                | C25H48O2  | 34.443 | 666 | 695 | 4.34% | 2733-88-2  | RL | 4753  | 380 | HaE |   |
| β-D-Mannofuranoside, farnesyl-                                                                                           | C21H36O6  | 15.956 | 693 | 745 | 4.70% |            | ML | 31505 | 384 | AdE |  |

|                                                     |                                                 |        |     |     |       |             |    |       |     |     |                                                                                       |
|-----------------------------------------------------|-------------------------------------------------|--------|-----|-----|-------|-------------|----|-------|-----|-----|---------------------------------------------------------------------------------------|
| <b>Fenretinide</b>                                  | C <sub>26</sub> H <sub>33</sub> NO <sub>2</sub> | 53.432 | 655 | 713 | 6.97% | 65646-68-6  | ML | 77816 | 391 | HaE | 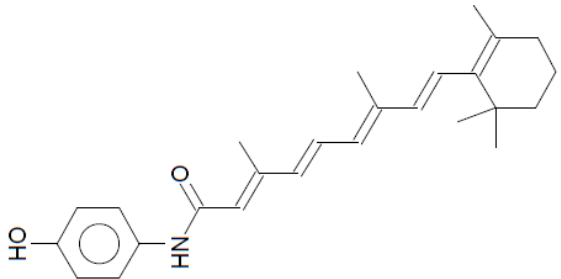   |
| <b>Ursodeoxycholic acid</b>                         | C <sub>24</sub> H <sub>40</sub> O <sub>4</sub>  | 44.128 | 668 | 680 | 3.63% | 128-13-2    | ML | 19201 | 392 | HaE |    |
| <b>3α,5α-Cyclo-ergosta-7,9(11),22t-triene-6β-ol</b> | C <sub>28</sub> H <sub>42</sub> O               | 29.846 | 596 | 651 | 4.07% | 18978-72-6  | ML | 6910  | 394 | PgE |   |
| <b>3α,5α-Cyclo-ergosta-7,9(11),22t-triene-6β-ol</b> | C <sub>28</sub> H <sub>42</sub> O               | 30.354 | 611 | 672 | 7.27% | 118978-72-6 | ML | 6910  | 394 | PgE |  |



|                                                                                                                  |                                                |        |     |     |       |            |    |         |     |            |                                                                                      |
|------------------------------------------------------------------------------------------------------------------|------------------------------------------------|--------|-----|-----|-------|------------|----|---------|-----|------------|--------------------------------------------------------------------------------------|
| <b>3-Isopropyl-6a,7,10b-trimethyl-dodecahydro-benzof[<i>f</i>]chromene-7,8-dicarboxylic acid, dimethyl ester</b> | C <sub>23</sub> H <sub>38</sub> O <sub>5</sub> | 42.216 | 572 | 598 | 4.41% |            | ML | 166394. | 394 | <i>PgE</i> | 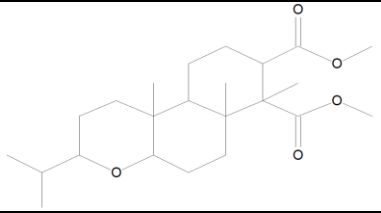  |
| <b>1,2-Propanediol, 3-(hexadecyloxy)-, diacetate</b>                                                             | C <sub>23</sub> H <sub>44</sub> O <sub>5</sub> |        | 696 | 709 | 6.13% | 21994-82-1 | ML | 7437    | 400 | <i>HaE</i> |   |
| <b>Campesterol</b>                                                                                               | C <sub>28</sub> H <sub>48</sub> O              | 47.068 | 726 | 776 | 14.8% | 474-62-4   | ML | 6713    | 400 | <i>HaE</i> |   |
| <b>5-Cholestene-3-ol, 24-methyl-</b>                                                                             | C <sub>28</sub> H <sub>48</sub> O              | 47.068 | 705 | 751 | 6.29% |            | ML | 6688    | 400 | <i>HaE</i> |  |

|                                                                |            |        |     |     |       |           |    |       |     |     |                                                                                       |
|----------------------------------------------------------------|------------|--------|-----|-----|-------|-----------|----|-------|-----|-----|---------------------------------------------------------------------------------------|
| Ergost-5-en-3-ol, (3β)-                                        | C28H48O    | 47.068 | 680 | 821 | 1.92% | 4651-51-8 | ML | 6865  | 400 | HaE | 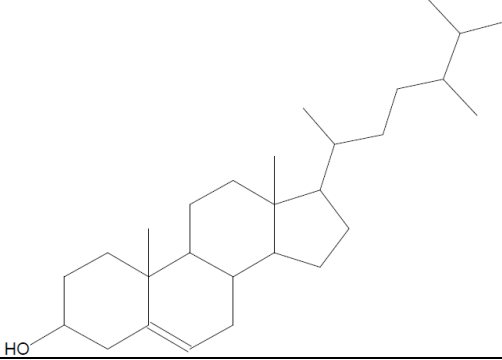   |
| cis-4,7,10,13,16,19-Docosahexaenoic acid, trimethylsilyl ester | C25H40O2Si | 15.500 | 645 | 658 | 8.94% | —         | ML | 37920 | 400 | AdE |    |
| 25-Hydroxycholesterol                                          | C27H46O2   | 40.316 | 664 | 683 | 5.61% | 2140-46-7 | ML | 27474 | 402 | HaE |    |
| 25-Hydroxycholesterol                                          | C27H46O2   | 44.128 | 670 | 703 | 3.94% | 2140-46-7 | ML | 27474 | 402 | HaE |  |

|                                                                                                                     |          |        |     |     |       |            |    |        |     |     |                                                                                      |
|---------------------------------------------------------------------------------------------------------------------|----------|--------|-----|-----|-------|------------|----|--------|-----|-----|--------------------------------------------------------------------------------------|
| <p>Methyl 3<math>\beta</math>-acetoxy-24,23-dinor-5<math>\beta</math>-chol-5-enoate</p>                             | C25H38O4 | 15.725 | 620 | 656 | 4.54% | 96092-29-4 | ML | 204501 | 402 | AdE | 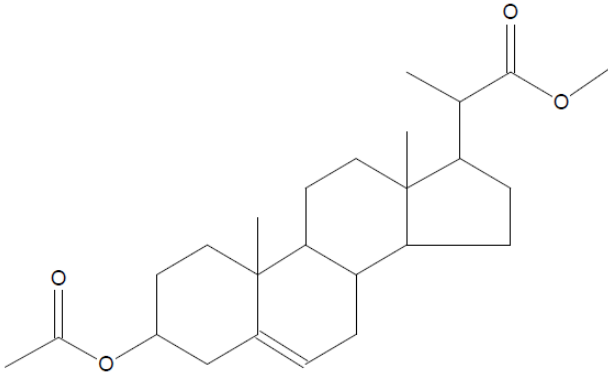  |
| <p>5H-Cyclopropa[3,4]benz[1,2-e]azulen-5-one, 9-(acetyloxy)-1,1a,1b,4,4a,7a,7b,8,9,9a-decahydro-4a,7b,9a-trihyd</p> | C22H30O7 | 51.087 | 623 | 641 | 8.68% | 70470-59-6 | ML | 147096 | 406 | HaE |  |

|              |         |        |     |     |       |         |    |       |     |     |                                                                                      |
|--------------|---------|--------|-----|-----|-------|---------|----|-------|-----|-----|--------------------------------------------------------------------------------------|
| Stigmasterol | C29H48O | 40.316 | 676 | 683 | 8.43% | 83-48-7 | RL | 4902  | 412 | HaE | 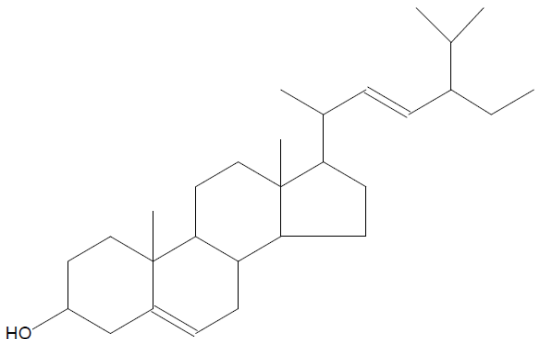  |
| Stigmasterol | C29H48O | 40.316 | 660 | 730 | 8.43% | 83-48-7 | ML | 19475 | 412 | HaE |   |
| Stigmasterol | C29H48O | 44.128 | 683 | 691 | 6.10% | 83-48-7 | RL | 4902  | 412 | HaE |  |

|                                                                                        |          |        |     |     |       |            |    |      |     |     |                                                                                      |
|----------------------------------------------------------------------------------------|----------|--------|-----|-----|-------|------------|----|------|-----|-----|--------------------------------------------------------------------------------------|
| <b><math>\beta</math>-Sitosterol</b>                                                   | C29H50O  | 47.068 | 743 | 777 | 27.6% | 83-46-5    | RL | 1982 | 414 | HaE | 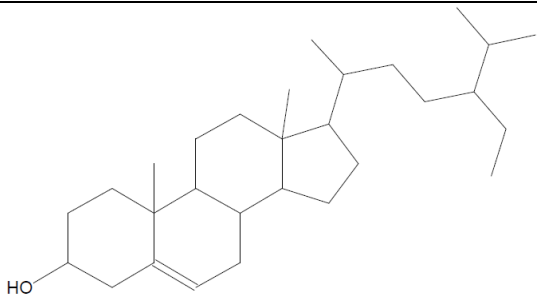  |
| <b><math>\gamma</math>-Sitosterol</b>                                                  | C29H50O  | 47.068 | 738 | 752 | 22.2% | 83-47-6    | ML | 6839 | 414 | HaE |   |
| <b>9,10-Secocholesta-5,7,10(19)-triene-3,24,25-triol, (3<math>\beta</math>,5Z,7E)-</b> | C27H44O3 | 51.087 | 647 | 720 | 23.8% | 40013-87-4 | ML | 6382 | 416 | HaE |  |

|                                                                                    |                                                   |        |     |     |       |            |    |       |     |     |  |
|------------------------------------------------------------------------------------|---------------------------------------------------|--------|-----|-----|-------|------------|----|-------|-----|-----|--|
| Cyclobutane, 1,3-bis[2-(2-isopropyl-3,3-dimethyloxiran-2-yl)ethenyl]-2,4-diacetyl- | C <sub>26</sub> H <sub>40</sub> O <sub>4</sub>    | 53.432 | 666 | 690 | 10.4% | 70373-02-3 | ML | 11557 | 416 | HaE |  |
| 10,12-Tricosadiynoic acid, trimethylsilyl ester                                    | C <sub>26</sub> H <sub>46</sub> O <sub>2</sub> Si | 15.725 | 650 | 666 | 13.3% |            | ML | 37660 | 418 | AdE |  |
| 8,14-Seco-3,19-epoxyandrosterane-8,14-dione, 17-acetoxy-3β-methoxy-4,4-dimethyl-   | C <sub>24</sub> H <sub>36</sub> O <sub>6</sub>    | 30.354 | 626 | 635 | 12.0% |            | ML | 32504 | 420 | PgE |  |
| Cholest-5-en-3-ol, 24-propylidene-, (3β)-                                          | C <sub>30</sub> H <sub>50</sub> O                 | 44.128 | 693 | 731 | 8.64% | 56362-45-9 | ML | 20346 | 426 | HaE |  |

|                                                       |                                                                |        |     |     |       |            |    |       |     |     |                                                                                       |
|-------------------------------------------------------|----------------------------------------------------------------|--------|-----|-----|-------|------------|----|-------|-----|-----|---------------------------------------------------------------------------------------|
| 1,2-Propanediol, 3-(octadecyloxy)-, diacetate         | C <sub>25</sub> H <sub>48</sub> O <sub>5</sub>                 |        | 694 | 721 | 5.66% | 21994-81-0 | ML | 7435  | 428 | HaE | 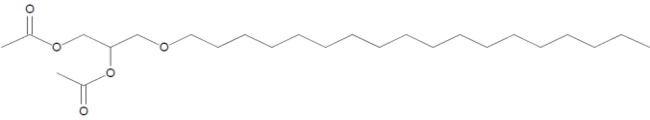   |
| Hexasiloxane, 1,1,3,3,5,5,7,7,9,9,11,11-dodecamethyl- | C <sub>12</sub> H <sub>38</sub> O <sub>5</sub> Si <sub>6</sub> | 42.216 | 593 | 700 | 9.12% | 995-82-4   | ML | 39868 | 430 | PgE |    |
| Hexasiloxane, 1,1,3,3,5,5,7,7,9,9,11,11-dodecamethyl- | C <sub>12</sub> H <sub>38</sub> O <sub>5</sub> Si <sub>6</sub> | 46.889 | 590 | 681 | 8.13% | 995-82-4   | ML | 39868 | 430 | PgE |    |
| Cholestan-3-one, cyclic 1,2-ethanediyl acetal, (5β)-  | C <sub>29</sub> H <sub>50</sub> O <sub>2</sub>                 | 20.351 | 678 | 691 | 3.44% | 25328-53-4 | ML | 65832 | 430 | AdE |   |
| i-Propyl 24-methyl-pentacos-5,9-dienoate              | C <sub>29</sub> H <sub>54</sub> O <sub>2</sub>                 | 37.203 | 710 | 739 | 3.16% |            | ML | 46210 | 434 | HaE |  |

|                                                                                   |          |        |     |     |       |            |    |       |     |     |                                                                                      |
|-----------------------------------------------------------------------------------|----------|--------|-----|-----|-------|------------|----|-------|-----|-----|--------------------------------------------------------------------------------------|
| Ethyl iso-allochololate                                                           | C26H44O5 | 40.316 | 658 | 666 | 4.38% |            | ML | 6654  | 436 | HaE | 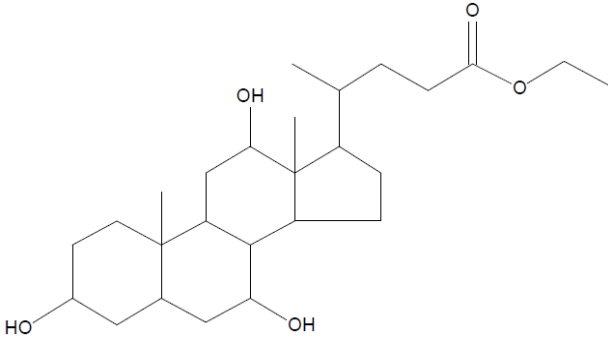  |
| Ergosta-5,22-dien-3-ol, acetate, (3 $\beta$ ,22E)-                                | C30H48O2 | 13.351 | 584 | 614 | 4.73% | 2458-53-9  | ML | 5700  | 440 | AdE |   |
| Cholan-24-oic acid, 3-(acetyloxy)-7-oxo-, methyl ester, (3 $\alpha$ ,5 $\beta$ )- | C27H42O5 | 53.432 | 646 | 684 | 4.75% | 10452-65-0 | ML | 75683 | 446 | HaE |  |



|                                                                                              |             |        |     |     |       |             |    |        |     |     |                                                                                       |
|----------------------------------------------------------------------------------------------|-------------|--------|-----|-----|-------|-------------|----|--------|-----|-----|---------------------------------------------------------------------------------------|
| Cholan-24-oic acid, 3-(acetyloxy)-7-oxo-, methyl ester, (3 $\alpha$ ,5 $\beta$ )-            | C27H42O5    | 56.828 | 617 | 644 | 5.63% | 10452-65-0  | ML | 75683  | 446 | HaE | 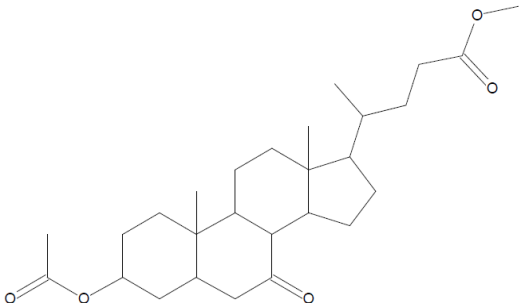   |
| Retinoyl- $\beta$ -glucuronide 6',3'-lactone                                                 | C26H34O7    | 51.087 | 614 | 654 | 6.30% | 101470-87-5 | ML | 132135 | 458 | HaE |    |
| 13,14-Epoxyursan-3-ol, acetate                                                               | C31H50O3    | 51.087 | 612 | 628 | 5.81% |             | ML | 155588 | 470 | HaE |   |
| 2-Myristinoyl pantetheine                                                                    | C25H44N2O5S | 20.351 | 692 | 711 | 5.66% |             | ML | 4307   | 484 | AdE |  |
| 9,10-Secocholesta-5,7,10(19)-triene-1,3-diol, 25-[(trimethylsilyl)oxy]-, (3 $\beta$ ,5Z,7E)- | C30H52O3Si  | 20.351 | 730 | 759 | 27.0% | 55759-94-9  | ML | 18660  | 488 | AdE |  |

|                                                                                   |                                                                |        |     |     |       |            |    |        |     |     |                                                                                      |
|-----------------------------------------------------------------------------------|----------------------------------------------------------------|--------|-----|-----|-------|------------|----|--------|-----|-----|--------------------------------------------------------------------------------------|
| 17-Pentatriacontene                                                               | C <sub>35</sub> H <sub>70</sub>                                | 23.805 | 717 | 728 | 4.13% | 6971-40-0  | ML | 22797  | 490 | PgE |   |
| Olean-12-ene-3,16,21,22,28-pentol, (3β,16α,21β,22α)-                              | C <sub>30</sub> H <sub>50</sub> O <sub>5</sub>                 | 56.828 | 614 | 664 | 4.97% | 13844-01-4 | ML | 170277 | 490 | HaE |   |
| 9,12,15-Octadecatrienoic acid, 2,3-bis[(trimethylsilyl)oxy]propyl ester, (Z,Z,Z)- | C <sub>27</sub> H <sub>52</sub> O <sub>4</sub> Si <sub>2</sub> | 29.846 | 639 | 690 | 18.5% | 55521-22-7 | ML | 41710  | 496 | PgE |   |
| 9,12,15-Octadecatrienoic acid, 2,3-bis[(trimethylsilyl)oxy]propyl ester, (Z,Z,Z)- | C <sub>27</sub> H <sub>52</sub> O <sub>4</sub> Si <sub>2</sub> | 30.354 | 632 | 702 | 15.3% | 55521-22-7 | ML | 41710  | 496 | PgE |  |

|                                                                                   |                                                                |        |     |     |       |            |    |       |     |     |  |
|-----------------------------------------------------------------------------------|----------------------------------------------------------------|--------|-----|-----|-------|------------|----|-------|-----|-----|--|
| 9,12,15-Octadecatrienoic acid, 2,3-bis[(trimethylsilyl)oxy]propyl ester, (Z,Z,Z)- | C <sub>27</sub> H <sub>52</sub> O <sub>4</sub> Si <sub>2</sub> | 46.889 | 571 | 635 | 3.74% | 55521-22-7 | ML | 41710 | 496 | PgE |  |
| 9,12,15-Octadecatrienoic acid, 2,3-bis[(trimethylsilyl)oxy]propyl ester, (Z,Z,Z)- | C <sub>27</sub> H <sub>52</sub> O <sub>4</sub> Si <sub>2</sub> | 51.087 | 611 | 665 | 5.59% | 55521-22-7 | ML | 41710 | 496 | HaE |  |
| 9,12,15-Octadecatrienoic acid, 2,3-bis[(trimethylsilyl)oxy]propyl ester, (Z,Z,Z)- | C <sub>27</sub> H <sub>52</sub> O <sub>4</sub> Si <sub>2</sub> | 56.828 | 617 | 650 | 5.63% | 55521-22-7 | ML | 41710 | 496 | HaE |  |
| 1-Monolinoleoylglycerol trimethylsilyl ether                                      | C <sub>27</sub> H <sub>54</sub> O <sub>4</sub> Si <sub>2</sub> | 29.846 | 656 | 702 | 33.9% | 54284-45-6 | ML | 39425 | 498 | PgE |  |
| 1-Monolinoleoylglycerol trimethylsilyl ether                                      | C <sub>27</sub> H <sub>54</sub> O <sub>4</sub> Si <sub>2</sub> | 30.354 | 645 | 711 | 23.7% | 54284-45-6 | ML | 39425 | 498 | PgE |  |

|                                              |                                                                      |        |     |     |       |            |    |       |     |     |                                                                                       |
|----------------------------------------------|----------------------------------------------------------------------|--------|-----|-----|-------|------------|----|-------|-----|-----|---------------------------------------------------------------------------------------|
| 1-Monolinoleoylglycerol trimethylsilyl ether | C <sub>27</sub> H <sub>54</sub> O <sub>4</sub> Si <sub>2</sub>       | 42.216 | 609 | 670 | 15.8% | 54284-45-6 | ML | 39425 | 498 | PgE | 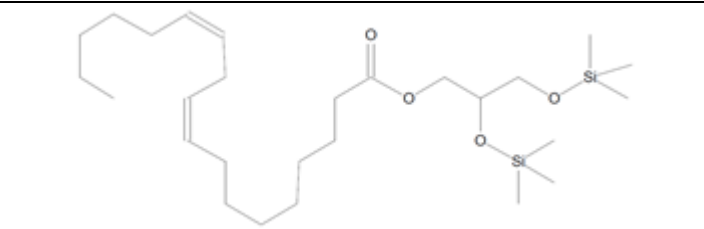   |
| 1-Monolinoleoylglycerol trimethylsilyl ether | C <sub>27</sub> H <sub>54</sub> O <sub>4</sub> Si <sub>2</sub>       | 46.889 | 612 | 670 | 20.6% | 54284-45-6 | ML | 39425 | 498 | PgE |    |
| 1-Monolinoleoylglycerol trimethylsilyl ether | C <sub>27</sub> H <sub>54</sub> O <sub>4</sub> Si <sub>2</sub><br>i2 | 51.087 | 625 | 679 | 9.41% | 54284-45-6 | ML | 3942  | 498 | HaE |    |
| 1-Monolinoleoylglycerol trimethylsilyl ether | C <sub>27</sub> H <sub>54</sub> O <sub>4</sub> Si <sub>2</sub><br>i2 | 56.828 | 625 | 661 | 7.65% | 54284-45-6 | ML | 39425 | 498 | HaE |   |
| Pseudosolasodine diacetate                   | C <sub>31</sub> H <sub>49</sub> NO<br>4                              | 18.751 | 736 | 756 | 5.58% |            | ML | 6693  | 499 | AdE |  |

|                                                                                                                                                          |                                                                           |               |            |            |              |                   |           |               |            |                   |                                                                                      |
|----------------------------------------------------------------------------------------------------------------------------------------------------------|---------------------------------------------------------------------------|---------------|------------|------------|--------------|-------------------|-----------|---------------|------------|-------------------|--------------------------------------------------------------------------------------|
| <p>Olean-12-ene-3,16,21,22,23,28-hexol, (3<math>\beta</math>,4<math>\alpha</math>,16<math>\alpha</math>,21<math>\beta</math>,22<math>\alpha</math>)-</p> | <p>C<sub>30</sub>H<sub>50</sub>O<sub>6</sub></p>                          | <p>56.828</p> | <p>637</p> | <p>656</p> | <p>11.5%</p> | <p>13844-22-9</p> | <p>ML</p> | <p>170116</p> | <p>506</p> | <p><i>HaE</i></p> | 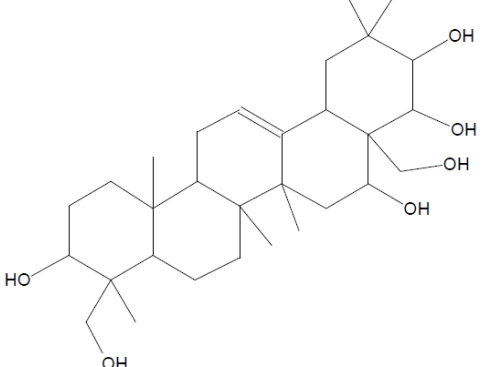  |
| <p>10,12-Docosadienedioic acid ditms</p>                                                                                                                 | <p>C<sub>28</sub>H<sub>50</sub>O<sub>4</sub>S<sub>i</sub><sub>2</sub></p> | <p>15.725</p> | <p>636</p> | <p>649</p> | <p>7.79%</p> | <p>—</p>          | <p>ML</p> | <p>37690</p>  | <p>506</p> | <p><i>AdE</i></p> |   |
| <p>Glycine, N-[(3<math>\alpha</math>,5<math>\beta</math>)-24-oxo-3-[(trimethylsilyl)oxy]chol an-24-yl]-, methyl ester</p>                                | <p>C<sub>30</sub>H<sub>53</sub>NO<sub>4</sub>Si</p>                       | <p>56.828</p> | <p>618</p> | <p>652</p> | <p>5.86%</p> | <p>57326-15-5</p> | <p>ML</p> | <p>102945</p> | <p>519</p> | <p><i>HaE</i></p> |  |

|                                                                     |                                                                |        |     |     |       |            |    |       |     |     |                                                                                       |
|---------------------------------------------------------------------|----------------------------------------------------------------|--------|-----|-----|-------|------------|----|-------|-----|-----|---------------------------------------------------------------------------------------|
| 9-Desoxo-9-x-acetoxy-3,8,12-tri-O-acetylingol                       | C <sub>28</sub> H <sub>40</sub> O <sub>10</sub>                | 53.432 | 692 | 705 | 34.8% |            | ML | 8015  | 536 | HaE | 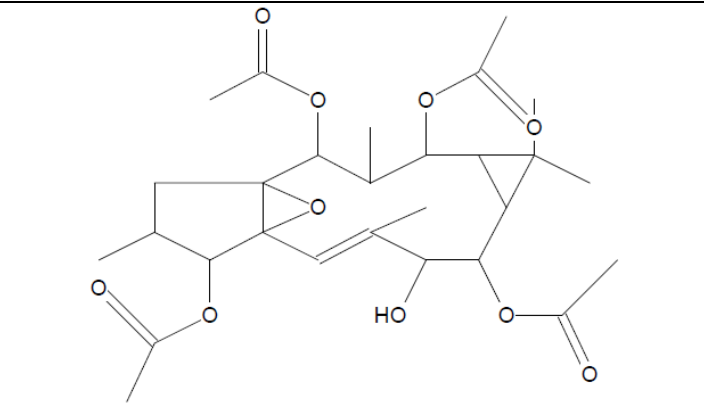   |
| Oleic acid, eicosyl ester                                           | C <sub>38</sub> H <sub>74</sub> O <sub>2</sub>                 | 34.443 | 656 | 665 | 2.87% | 22393-88-0 | ML | 25265 | 562 | HaE |    |
| Octasiloxane, 1,1,3,3,5,5,7,7,9,9,11,11,13,13,15,15-hexadecamethyl- | C <sub>16</sub> H <sub>50</sub> O <sub>7</sub> Si <sub>8</sub> | 42.216 | 581 | 692 | 6.07% | 19095-24-0 | ML | 39429 | 578 | PgE |    |
| Octasiloxane, 1,1,3,3,5,5,7,7,9,9,11,11,13,13,15,15-hexadecamethyl- | C <sub>16</sub> H <sub>50</sub> O <sub>7</sub> Si <sub>8</sub> | 46.889 | 587 | 680 | 7.18% | 19095-24-0 | ML | 39429 | 578 | PgE |   |
| Oleic acid, 3-(octadecyloxy)propyl ester                            | C <sub>39</sub> H <sub>76</sub> O <sub>3</sub>                 | 34.443 | 657 | 689 | 2.99% | 17367-41-8 | ML | 22460 | 592 | HaE |  |
| Hexadecane, 1,1-bis(dodecyloxy)-                                    | C <sub>40</sub> H <sub>82</sub> O <sub>2</sub>                 | 23.805 | 727 | 758 | 6.27% | 56554-64-4 | ML | 7351  | 594 | PgE |  |

|                                                                   |                                                 |        |     |     |       |            |    |       |      |     |  |
|-------------------------------------------------------------------|-------------------------------------------------|--------|-----|-----|-------|------------|----|-------|------|-----|--|
| .psi.,.psi.-Carotene,<br>1,1',2,2'-tetrahydro-1,1'-<br>dimethoxy- | C <sub>42</sub> H <sub>64</sub> O <sub>2</sub>  | 40.316 | 659 | 659 | 4.56% | 13833-01-7 | ML | 37544 | 600  | HaE |  |
| .psi.,.psi.-Carotene,<br>1,1',2,2'-tetrahydro-1,1'-<br>dimethoxy- | C <sub>42</sub> H <sub>64</sub> O <sub>2</sub>  | 44.128 | 666 | 666 | 3.35% | 13833-01-7 | ML | 37544 | 600  | HaE |  |
| Digitoxin                                                         | C <sub>41</sub> H <sub>64</sub> O <sub>13</sub> | 13.351 | 603 | 641 | 9.74% | 71-63-6    | RL | 8938  | 764  | AdE |  |
| Docosahexaenoic acid,<br>1,2,3-propanetriyl ester                 | C <sub>69</sub> H <sub>98</sub> O <sub>6</sub>  | 27.125 | 681 | 691 | 4.38% | 11094-59-0 | ML | 44271 | 1022 | PgE |  |

## Abbreviations

MF: Match factor

RT: Retention time

RMF: Reverse match factor

Prob (%): Probability%

CAS#: Chemical abstract service registry number

Lib: Library

RL: Reliable library

ML: Main library

Ext: Extract
